# Supplementary material
Source: HighWire-hosted journal article supplement (https://bmjopen.bmj.com/content/7/8/e017715)
Supplement: inline-supplementary-material-2 [file inline-supplementary-material-2.pdf]

Supplemental table. Operational definitions of ACS variables included in final prediction model.

| Category    | Variable name              | Variable description                                                                                                                                                          | ACS Table Number | Cut point (median) for EMM analysis |
|-------------|----------------------------|-------------------------------------------------------------------------------------------------------------------------------------------------------------------------------|------------------|-------------------------------------|
| Demographic | White race                 | Percent of individuals identifying as white, non-Hispanic                                                                                                                     | B03002           | 48.3%                               |
| Wealth      | Household income <\$30,000 | Household income in the past 12 months (in 2013 inflation-adjusted dollars)                                                                                                   | B19001           | 28.0%                               |
|             | Household income ≥\$60,000 | Household income in the past 12 months (in 2013 inflation-adjusted dollars)                                                                                                   | B19001           | 40.4%                               |
| Work        | Working class              | Percent of individuals reporting jobs in sales, service (except protective), production, transportation, and material moving, natural resources, construction and maintenance | C24010           | 61.4%                               |
|             | Disabled                   | Percent of individuals with a disability                                                                                                                                      | B18135           | 10.3%                               |
|             | Mean usual hours worked    | Mean number of hours worked annually                                                                                                                                          | B23020           | 37.9 hours                          |
| Household   | Units occupied             | Percent of occupied housing units                                                                                                                                             | B25002           | 92.3%                               |

ACS=American Community Survey; EMM=Effect measure modification
